# Supplementary material
Source: Springer Nature journal article supplement (https://www.springermedizin.de/resource/supplementary/12871_2013_348_MOESM2_ESM.pdf/9429080)
Supplement: MOESM2 [file 9429080]

Classification of all organisms isolated from blood cultures in study patients

| Positive blood culture        | Probable contaminant             |
|-------------------------------|----------------------------------|
| Acinetobacter lwoffii         | Bacillus sp.                     |
| Actinobaculum urinale         | Coagulase negative staphylococci |
| Anaerobic Gram positive cocci | Corynebacterium sp.              |
| Anaerobic streptococci        | Diphtheroids                     |
| Bacteroides fragilis          | Gram positive bacilli            |
| Candida                       | Micrococcus sp.                  |
| Candida albicans              | Propionibacterium sp.            |
| Candida glabrata              | Staphylococcus capitis           |
| Candida guilliermondii        | Staphylococcus epidermidis       |
| Clostridium sp.               | Staphylococcus haemolyticus      |
| Enterococcus faecalis         | Staphylococcus hominis           |
| Enterococcus faecium          | Staphylococcus warneri           |
| Escherichia coli              |                                  |
| Group B streptococci          |                                  |
| Klebsiella oxytoca            |                                  |
| Klebsiella pneumoniae         |                                  |
| Pantoea sp.                   |                                  |
| Proteus mirabilis             |                                  |
| Proteus vulgaris              |                                  |
| Pseudomonas aeruginosa        |                                  |
| Rhodotorula mucilaginosa      |                                  |
| Serratia liquefaciens         |                                  |
| Serratia marcescens           |                                  |
| Staphylococcus aureus         |                                  |
| Streptococcus anginosus       |                                  |
| Streptococcus gallolyticus    |                                  |
| Streptococcus milleri group   |                                  |
| Streptococcus mitis           |                                  |
| Streptococcus pneumoniae      |                                  |
| Streptococcus pyogenes        |                                  |
